# Supplementary material
Source: PubMed Central journal article supplement (PMC2996030)
Supplement: pp.110.166389_1.pdf [file pp.110.166389_1.pdf]

**Table S1. Primers used for molecular cloning, screening for homozygous transgenic plants, and reverse-transcriptase PCR.**

| Primer pair | Used for                                                                                                                | Primer sequences                                                            |
|-------------|-------------------------------------------------------------------------------------------------------------------------|-----------------------------------------------------------------------------|
| 1           | cloning of full length <i>MMP1</i> cDNA                                                                                 | For 5'-ATGGATGAATTTGAATCTAC-3'<br>Rev 5'-TTAACAGAAAACCGATAG-3'              |
| 2           | screening of homozygous transgenic plants by partial amplification of the <i>AAP1</i> promoter and the <i>MMP1</i> gene | For 5'-TCCCTCCATATGTGGTCTCTGTC-3'<br>Rev 5'-GGTCAGGTGCTTTGATCTAGGACC-3'     |
| 3           | screening of homozygous transgenic plants by amplifying the kanamycin resistance <i>NPTII</i> gene (ECU32991)           | For 5'-ACCGGATCTGGATCG-3'<br>Rev 5'-TTGGTCGGTCATTTCGAACC-3'                 |
| 4           | <i>MMP1</i> expression analysis of using reverse-transcriptase PCR                                                      | For 5'-CGAAGTCCTCTAACGAATGTCCGCTA-3'<br>Rev 5'-GCTTCCCGTTTGTTATTGCCTTGAG-3' |
| 5           |                                                                                                                         | For 5'-CGAAGTCCTCTAACGAATGTCCGCTA-3'<br>Rev 5'-CGGGCAGCGAAAGGTACG-3'        |
| 6           | amplification of <i>EF1<math>\alpha</math></i> (X96555) as control for reverse-transcriptase PCR                        | For 5' CAGTGGGACGTGTTGAAACTGGTGT-3'<br>Rev 5'-CATGATGATGACCTGGGACGTGAAGT-3' |
| 7           | cloning of a partial pea <i>CAT6</i> cDNA                                                                               | For 5'-GCSGTTTCRACBATGGCRGARGAAG-3'<br>Rev 5'-CTACTACTYTGAACTTTGGTCCWC-3'   |
