# Supplementary material
Source: PubMed Central journal article supplement (PMC2996030)
Supplement: pp.110.166389_2.pdf [file pp.110.166389_2.pdf]

**Table S2. Primers employed for expression analysis using quantitative RT-PCR.**

Pea gene accession numbers are provided when specific pea gene sequences were available. If pea genes were unknown, degenerated primers were designed along at least two legume species sequences. The gene accession numbers of the legume homologs are listed.

| Protein and Gene                                               | Pea accessions (bold) or accessions of legume homologs                                                                                                                          | Primer sequences                                                                  |
|----------------------------------------------------------------|---------------------------------------------------------------------------------------------------------------------------------------------------------------------------------|-----------------------------------------------------------------------------------|
| Adenosine 5'-phosphosulfate reductase ( <i>APR</i> )           | <b>AY166631</b>                                                                                                                                                                 | For: 5'-TCACAAGGATACATTTCCATTGGATG-3'<br>Rev: 5'-CTTCCCACCACCATCTACCTTCTCTC-3'    |
| L-Asparaginase ( <i>ASNase</i> )                               | <i>Glycine max</i> (AY096000)<br><i>Arachis hypogaea</i> (DQ889570)<br><i>Phaseolus vulgaris</i> (DQ300284)                                                                     | For: 5'-GTYATGGAHAARTCYCCDCATTCTTA-3'<br>Rev: 5'-AMCARGATTGYDTTTCYTCCTTTGC-3'     |
| Asparagine synthetase 1 ( <i>AS1</i> )                         | <b>X52179</b>                                                                                                                                                                   | For: 5'-CTGTCACTGCTAGATACCTTGCTGGT-3'<br>Rev: 5'-GAGACATCAGAAACATAGGTGTTGCA-3'    |
| Convicilin ( <i>Cvc</i> )                                      | <b>X06398</b>                                                                                                                                                                   | For: 5'-TTAGAAGAGCAAGAGAAAAACACAA-3'<br>Rev: 5'-GAAAGGTTCAAATTCAGAGGGTAAGC-3'     |
| Cysteine synthase/OAS thiol-lyase ( <i>OASTL</i> )             | <i>Cicer arietinum</i> (AJ006024)<br><i>Glycine max</i> (EF584897)<br><i>Glycine max</i> (AF452451)<br><i>Trifolium subterraneum</i> (EF193210)<br><i>Vicia faba</i> (EF193211) | For: 5'-ATGAAACCACHGGTCCAGAGATATGG-3'<br>Rev: 5'-CCAGCACCAATCCCTTGAATCTTGTG-3'    |
| Glutamate synthase-ferredoxin dependent [ <i>GOGAT</i> (Fd)]   | <i>Glycine max</i> (AF039851)<br><i>Medicago truncatula</i> (AC147961)<br><i>Securigera parviflora</i> (AY278214)                                                               | For: 5'-GCTGTCAGAACTCACTTGCTGAAGC-3'<br>Rev: 5'-CCTCRTCAAGAATGTAAGCCAACCCT-3'     |
| Glutamate synthase-NADH dependent [ <i>GOGAT</i> (NADH)]       | <i>Phaseolus vulgaris</i> (AF314925)<br><i>Medicago sativa</i> (L37606)                                                                                                         | For: 5'-CACAGATTGCATWGGAAACATCCATTC-3'<br>Rev: 5'-CCATTTTCATCTCCCAMAAACCTCTTAG-3' |
| Glutamine synthetase 1, cytosolic ( <i>GS1</i> )               | <b>M20663</b>                                                                                                                                                                   | For: 5'-AATTGAGAAGCTCGGGAAGAGGCTGC-3'<br>Rev: 5'-CTGTTTCGTGTTCCCTGTCAATCTG-3'     |
| Glutamine synthetase 2, chloroplastic ( <i>GS2</i> )           | <b>M20664</b>                                                                                                                                                                   | For: 5'-GAAAATGGCACCATCAATAGGGTAGAG-3'<br>Rev: 5'-AGGGATGCGAAACAGGCTTGTATATG-3'   |
| Glutamine synthetase 3, cytosolic ( <i>GS3</i> )               | <b>U28925</b>                                                                                                                                                                   | For: 5'-GTTTCATTTGACCCAAAGCCTATTCC-3'<br>Rev: 5'-TCCATAAGCTGCAATGTGTTCTTAT-3'     |
| Homocysteine S-methyltransferase ( <i>HMT</i> )                | <i>Astragalus bisulcatus</i> (AJ131433)<br><i>Medicago sativa</i> (DQ873667)                                                                                                    | For: 5'-GAAGAAGGTSAAACYCTGCTTMGRAG-3'<br>Rev: 5'-CCATCAGCYAAATARGCRCCATAGC-3'     |
| Legumin A ( <i>LegA</i> )                                      | <b>X02982</b>                                                                                                                                                                   | For: 5'-CAAAGGAGAAGAGGAGAGGAGGAAGA-3'<br>Rev: 5'-CTACCAGCTTCAGGGTTGTAGATGC-3'     |
| Legumin B ( <i>LegB</i> )                                      | <b>M16903</b>                                                                                                                                                                   | For: 5'-GGTTAGCCACGTACAACAGGTGCTTA-3'<br>Rev: 5'-GATTGAGATTGCGACTGAGGGTGAAC-3'    |
| Vicilin ( <i>Vic</i> )                                         | <b>Y00722</b>                                                                                                                                                                   | For: 5'-CAAAGAAATGAAAACCAACAAGAGCAG-3'<br>Rev: 5'-GCATTAATACCAAACCAAGCAAATC-3'    |
| Methionine S-methyltransferase ( <i>MMT</i> )                  | <i>Glycine max</i> (AK287323)<br><i>Medicago truncatula</i> (AC148097)                                                                                                          | For: 5'-GGTTTGGAATTTGACWGTRAAGGCTG-3'<br>Rev: 5'-CCTCCRAGMAGAGACACASAGAAYG-3'     |
| Amino acid permease 1 ( <i>AAP1</i> )                          | <b>AY956395</b>                                                                                                                                                                 | For: 5'-GCTGGAACCATTACTGGAGTAAATGA-3'<br>Rev: 5'-GACTCTGACGGTGGTGGTCTTTTAC-3'     |
| Amino acid permease 2 ( <i>AAP2</i> )                          | <b>AY956396</b>                                                                                                                                                                 | For: 5'-AGCAAGCCACGAGGATAAGTATAGGC-3'<br>Rev: 5'-CAGTGAGTAAGTTTCTGGCGATGTG-3'     |
| Cationic amino acid transporter 6 ( <i>CAT6</i> )              | <b>Partial clone</b> (see <i>SI</i> Materials and Methods)                                                                                                                      | For: 5'-GGTTCGGAGTGTTCGCTGTTACG-3'<br>Rev: 5'-TGAAACTTTGGTCCACTCTTTCTTTGA-3'      |
| Sulfate transporter ( <i>SST1</i> )                            | <i>Glycine max</i> (AK244423)<br><i>Lotus japonica</i> (AP009831)                                                                                                               | For: 5'-CGGAAGGAATAGCMATWGGAAAGAAGC-3'<br>Rev: 5'-ATAGCTGAWAGDGAACAAGWGGKGTG-3'   |
| Sulfate transporter ( <i>ST</i> )                              | <i>Lotus japonica</i> (AP006424)<br><i>Medicago truncatula</i> (AC195567)<br><i>Stylosanthes hamate</i> (X82255)<br><i>Stylosanthes hamate</i> (X82256)                         | For: 5'-GCTTGGHTTCTTGATWGAYTTCCTATC-3'<br>Rev: 5'-CCWAGHAGACCTTTAAGYTGTGSAG-3'    |
| Elongation factor 1 $\alpha$ ( <i>EF1<math>\alpha</math></i> ) | <b>X96555</b>                                                                                                                                                                   | For: 5'-CAGTGGGACGTGTTGAACTGGTGT-3'<br>Rev: 5'-ATCGAACATTGTCTCCTGGAAGAGCC-3'      |
| Ubiquitin ( <i>PUB</i> )                                       | <b>L81139, L81140, L81141, L81142</b>                                                                                                                                           | For: 5'-GGCAAAAATACAGGACAAGGAGGGAA-3'<br>Rev: 5'-CGCAAMACHAGGTGRAGAGTRGACTC-3'    |
